# Supplementary material
Source: Springer Nature journal article supplement (https://www.springermedizin.de/resource/supplementary/12887_2011_634_MOESM2_ESM.pdf/9475696)
Supplement: MOESM2 [file 9475696]

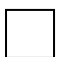

'Object': fixed activity (e.g. data collection)

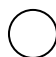

'Activity': flexible

| Time point    | Intervention | Control |
|---------------|--------------|---------|
| Screening     |              | A       |
| 0 months      |              | B       |
| Randomisation |              | C       |
| 2 months      | D            |         |
| 3 months      | E            |         |
| 5 months      | E            |         |
| 6 months      | F            |         |
| 7 months      | E            |         |
| 9 months      | E            |         |
| 11 months     | E            |         |
| 13 months     | E            |         |
| 15 months     | E G H I      | G I     |

A

Children screened for eligibility by measuring height and weight at participating general practices across Melbourne. Researchers contact eligible families to invite the family into the trial. Interested families mailed a baseline parent questionnaire and consent form.

B

Participating GPs return a Memorandum of Understanding and complete a baseline questionnaire. GPs undergo training to deliver intervention.

C

Children are enrolled into the trial and randomised upon return of the baseline parent questionnaire and consent form.

D

Intervention arm children and parent/s attend a tertiary weight management clinic appointment with obesity specialists.

E

Intervention arm children and parent/s attend a 15 to 30 minute GP appointment to receive weight management counselling, goal-setting, and tracking of progress.

F

The obesity specialists perform a formal review of each intervention child's progress using information in the shared care software and received from the child's participating GP. The obesity specialists send a letter of guidance to the GP about each patient.

G

Home visit conducted by a researcher blinded to allocation status to collect outcome data.

H

GPs who were randomly allocated intervention arm children complete a written questionnaire regarding their experience of the trial.

I

An audit of each GP practice is conducted to record 1) the number of GP appointments each child (intervention and control) attended during the period they were enrolled in the trial, and 2) whether weight management was discussed during the appointment.
